# Supplementary material for: A self-healing, recyclable, and degradable fire-retardant gelatin-based biogel coating for green buildings
Source: Royal Society of Chemistry journal article supplement (doi:10.1039/d1sm00435b), 2021-01-01
Supplement: d1sm00435b1.pdf [file d1sm00435b1.pdf]

## Supporting Information

### Self-healing, recyclable, and degradable fire-retardant gelatin-based biogel coating for green buildings

Lei Zhang<sup>a, b, 1</sup>, Yubin Huang<sup>a, b, 1</sup>, Ping Sun<sup>a, b</sup>, Yun Hai<sup>a, b</sup>, and Saihua Jiang<sup>a, b, \*</sup>

<sup>a</sup> School of Mechanical and Automotive Engineering, Institute of Safety Science and Engineering, South China University of Technology, Wushan Road 381, Guangzhou, 510641, P. R. China

<sup>b</sup> Guangdong Provincial Key Laboratory of Technique and Equipment for Macromolecular Advanced Manufacturing, South China University of Technology, Guangzhou, 510641, P. R. China

<sup>1</sup>These authors contribute to this work equally.

#### Corresponding author:

\*E-mail: meshjiang@scut.edu.cn (S.H. Jiang)

#### Contents:

Figures S1–S7 and Tables S1 (PDF)

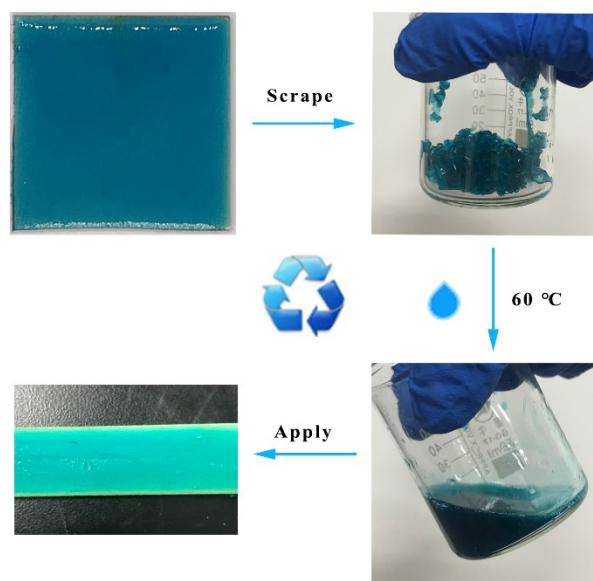

**Fig. S1.** Illustration of recycling process of biogel on obsolete wood.

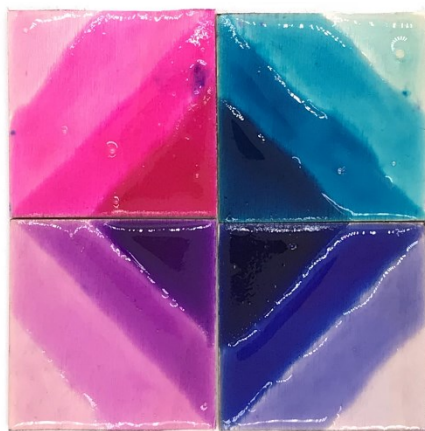

**Fig. S2.** Colorful biogels can be obtained as needed for aesthetics.

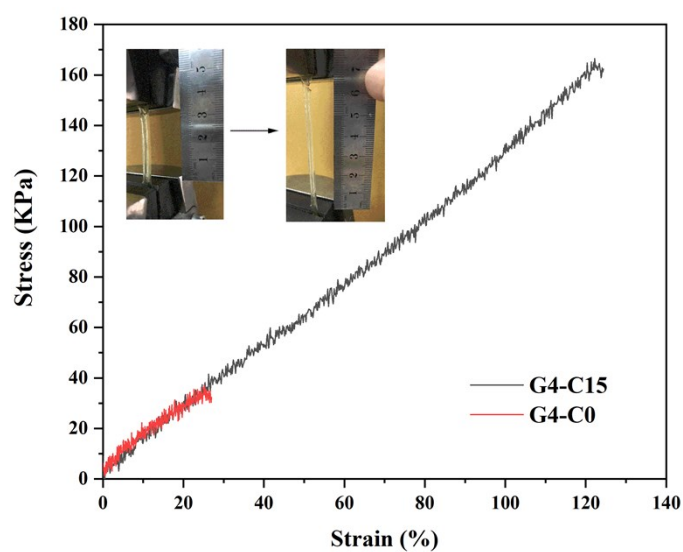

Fig. S3. Typical tensile stress-strain curves of G4-C15 and G4-C0 biogel.

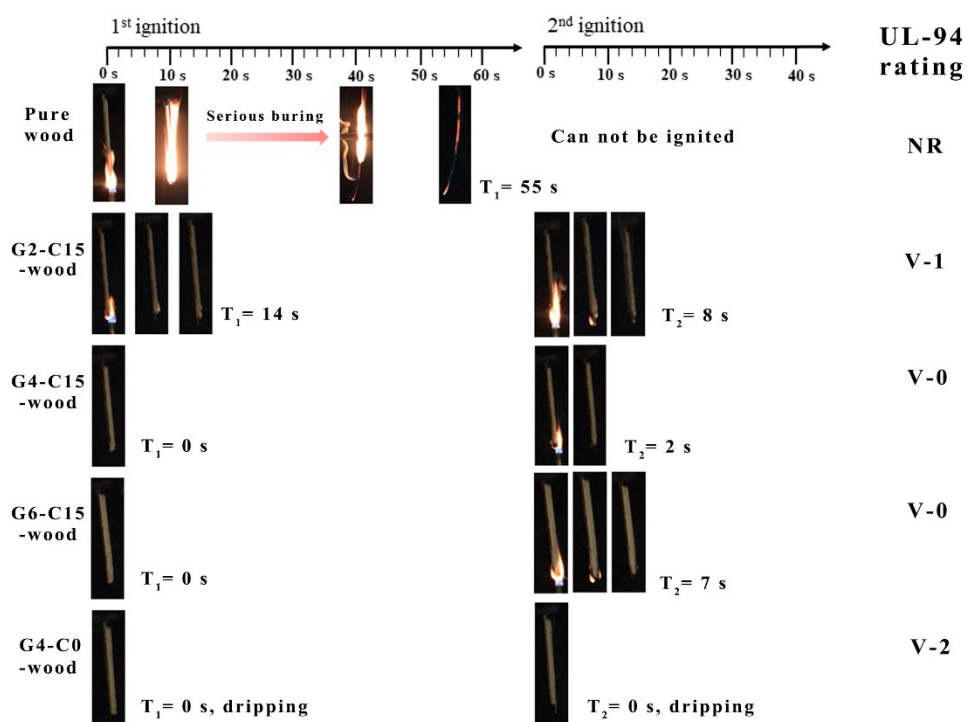

Fig. S4. Vertical combustibility test of uncoated and biogel-coated woods.

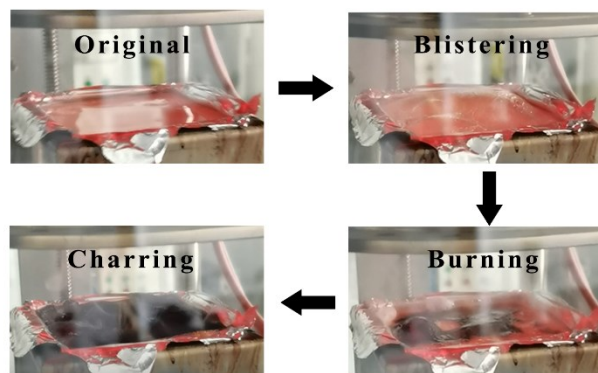

**Fig. S5.** Three combustion stages of biogel-coated wood during the cone calorimetry test.

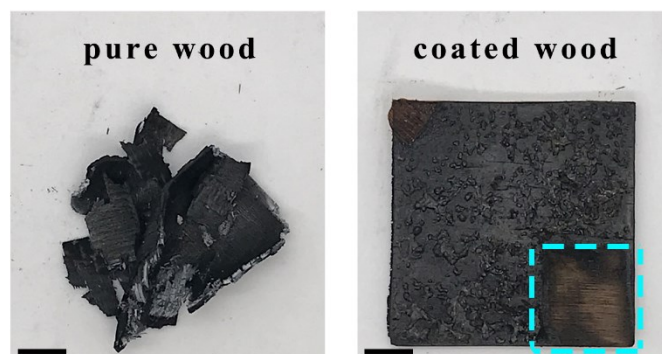

**Fig. S6.** Optical image of pure wood (left) and coated wood (right) after being subjected to butane flame for 30 s (scale bar: 1 cm). The highlighted area is the inner intact wood after eliminating the char.

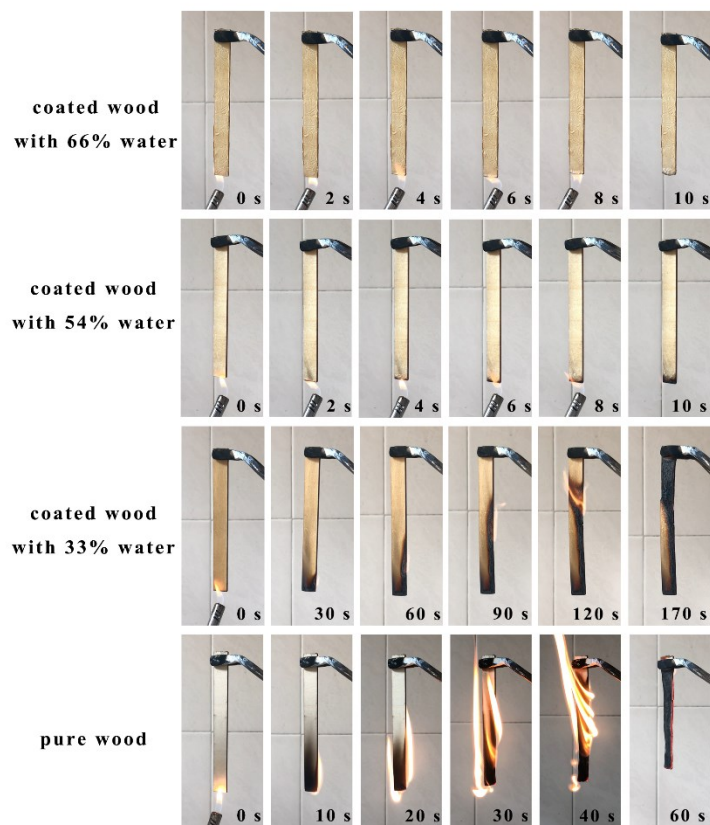

**Fig. S7.** Ignition test of coated woods with different water content in biogel.

**Table S1.** Formulation of samples for TGA test.

| Samples                   | Gelatin (g) | 4 wt%             |              |              | Char residue (%) |
|---------------------------|-------------|-------------------|--------------|--------------|------------------|
|                           |             | Chitosan solution | Glycerol (g) | DI water (g) |                  |
| Gelatin                   | 4           | 0                 | 0            | 35           | 22.8             |
| Gelatin+Glycerol          | 4           | 0                 | 5            | 30           | 8.5              |
| Gelatin+Glycerol+Chitosan | 4           | 15                | 5            | 15           | 13.1             |
